# Supplementary material for: Analysis of the Effect of Mixed Fermentation on the Quality of Distilled Jujube Liquor by Gas Chromatography-Ion Mobility Spectrometry and Flavor Sensory Description
Source: MDPI journal article supplement (doi:10.3390/foods12040795), 2023-02-13
Supplement: s1 [file s1]

**Table S1.** The flavor compounds presented in the jujube liquor by GC-IMS.

| Count     | Compound                | CAS       | Formula                                        | RI      | Rt[sec] | Dt[RIprel] |
|-----------|-------------------------|-----------|------------------------------------------------|---------|---------|------------|
| Esters    |                         |           |                                                |         |         |            |
| 1         | Ethyl octanoate         | 64-19-7   | C <sub>10</sub> H <sub>20</sub> O <sub>2</sub> | 1450.20 | 1140.72 | 1.48       |
| 2         | Ethyl heptanoate        | 106-30-9  | C <sub>9</sub> H <sub>18</sub> O <sub>2</sub>  | 1341.40 | 900.88  | 1.38       |
| 3         | Ethyl hexanoate         | 123-66-0  | C <sub>8</sub> H <sub>16</sub> O <sub>2</sub>  | 1224.50 | 703.90  | 1.79       |
| 4         | Isoamyl acetate-M       | 123-92-2  | C <sub>7</sub> H <sub>14</sub> O <sub>2</sub>  | 1141.60 | 556.72  | 1.41       |
| 5         | Isoamyl acetate-D       | 123-92-2  | C <sub>7</sub> H <sub>14</sub> O <sub>2</sub>  | 1141.60 | 556.72  | 1.75       |
| 6         | Ethyl 3-methylbutanoate | 108-64-5  | C <sub>7</sub> H <sub>14</sub> O <sub>2</sub>  | 1080.90 | 457.79  | 1.27       |
| 7         | Ethyl butanoate         | 105-54-5  | C <sub>6</sub> H <sub>12</sub> O <sub>2</sub>  | 1053.90 | 422.51  | 1.56       |
| 8         | Isobutyl acetate-M      | 110-19-0  | C <sub>6</sub> H <sub>12</sub> O <sub>2</sub>  | 1031.30 | 395.23  | 1.34       |
| 9         | Isobutyl acetate-D      | 110-19-0  | C <sub>6</sub> H <sub>12</sub> O <sub>2</sub>  | 1030.50 | 394.20  | 1.62       |
| 10        | Propyl acetate          | 109-60-4  | C <sub>5</sub> H <sub>10</sub> O <sub>2</sub>  | 996.70  | 356.63  | 1.28       |
| 11        | Ethyl isobutyrate-M     | 97-62-1   | C <sub>6</sub> H <sub>12</sub> O <sub>2</sub>  | 984.60  | 346.85  | 1.32       |
| 12        | Ethyl isobutyrate-D     | 97-62-1   | C <sub>6</sub> H <sub>12</sub> O <sub>2</sub>  | 985.90  | 347.88  | 1.56       |
| 13        | Ethyl propanoate-M      | 105-37-3  | C <sub>5</sub> H <sub>10</sub> O <sub>2</sub>  | 977.90  | 341.706 | 1.28       |
| 14        | Ethyl propanoate-D      | 105-37-3  | C <sub>5</sub> H <sub>10</sub> O <sub>2</sub>  | 977.30  | 341.192 | 1.46       |
| 15        | Ethyl acetate           | 141-78-6  | C <sub>4</sub> H <sub>8</sub> O <sub>2</sub>   | 903.40  | 288.87  | 1.34       |
| 16        | Ethyl formate-M         | 109-94-4  | C <sub>3</sub> H <sub>6</sub> O <sub>2</sub>   | 848.90  | 255.52  | 1.06       |
| 17        | Ethyl formate-D         | 109-94-4  | C <sub>3</sub> H <sub>6</sub> O <sub>2</sub>   | 851.00  | 256.711 | 1.22       |
| 18        | Ethyl lactate           | 97-64-3   | C <sub>5</sub> H <sub>10</sub> O <sub>3</sub>  | 1362.50 | 943.08  | 1.54       |
| 19        | Butyl acetate           | 123-86-4  | C <sub>6</sub> H <sub>12</sub> O <sub>2</sub>  | 1109.20 | 500.04  | 1.61       |
| Alcohols  |                         |           |                                                |         |         |            |
| 20        | 1-Hexanol               | 111-27-3  | C <sub>6</sub> H <sub>14</sub> O               | 1359.20 | 936.42  | 1.32       |
| 21        | 3-Methyl-1-butanol-M    | 123-51-3  | C <sub>5</sub> H <sub>12</sub> O               | 1225.80 | 705.89  | 1.24       |
| 22        | 3-Methyl-1-butanol-D    | 123-51-3  | C <sub>5</sub> H <sub>12</sub> O               | 1226.60 | 707.04  | 1.49       |
| 23        | 1-Butanol-M             | 71-36-3   | C <sub>4</sub> H <sub>10</sub> O               | 1163.00 | 597.66  | 1.26       |
| 24        | 1-Butanol-D             | 71-36-3   | C <sub>4</sub> H <sub>10</sub> O               | 1163.50 | 598.64  | 1.38       |
| 25        | (E)-2-Pentenal          | 1576-87-0 | C <sub>5</sub> H <sub>8</sub> O                | 1152.40 | 577.01  | 1.38       |
| 26        | 2-Methyl-1-propanol-M   | 78-83-1   | C <sub>4</sub> H <sub>10</sub> O               | 1109.70 | 500.87  | 1.26       |
| 27        | 2-Methyl-1-propanol-D   | 78-83-1   | C <sub>4</sub> H <sub>10</sub> O               | 1110.60 | 502.40  | 1.37       |
| 28        | 1-Propanol              | 71-23-8   | C <sub>3</sub> H <sub>8</sub> O                | 1055.60 | 424.72  | 1.25       |
| 29        | Ethanol                 | 64-17-5   | C <sub>2</sub> H <sub>6</sub> O                | 948.60  | 319.84  | 1.14       |
| 30        | Methanol                | 67-56-1   | CH <sub>4</sub> O                              | 892.20  | 281.73  | 0.98       |
| 31        | 2-Propanol              | 67-63-0   | C <sub>3</sub> H <sub>8</sub> O                | 936.30  | 311.11  | 1.26       |
| Aldehydes |                         |           |                                                |         |         |            |
| 32        | Nonanal                 | 124-19-6  | C <sub>9</sub> H <sub>18</sub> O               | 1408.20 | 1041.53 | 1.48       |
| 33        | 3-Methylbutanal         | 590-86-3  | C <sub>5</sub> H <sub>10</sub> O               | 932.90  | 308.72  | 1.40       |
| 34        | 2-Methylpropanal        | 78-84-2   | C <sub>4</sub> H <sub>8</sub> O                | 837.00  | 248.77  | 1.28       |
| 35        | Propanal-M              | 123-38-6  | C <sub>3</sub> H <sub>6</sub> O                | 822.60  | 240.83  | 1.05       |

|          |                      |          |                                              |         |         |      |
|----------|----------------------|----------|----------------------------------------------|---------|---------|------|
| 36       | Propanal-D           | 123-38-6 | C <sub>3</sub> H <sub>6</sub> O              | 823.40  | 241.23  | 1.15 |
| 37       | Acetaldehyde         | 75-07-0  | C <sub>2</sub> H <sub>4</sub> O              | 768.20  | 213.04  | 0.98 |
| 38       | Butanal              | 123-72-8 | C <sub>4</sub> H <sub>8</sub> O              | 893.60  | 282.58  | 1.13 |
| Ketones  |                      |          |                                              |         |         |      |
| 39       | 3-Hydroxy-2-butanone | 513-86-0 | C <sub>4</sub> H <sub>8</sub> O <sub>2</sub> | 1290.40 | 806.82  | 1.31 |
| 40       | 2-Heptanone          | 110-43-0 | C <sub>7</sub> H <sub>14</sub> O             | 1246.60 | 736.86  | 1.64 |
| 41       | 2,3-Pentanedione     | 600-14-6 | C <sub>5</sub> H <sub>8</sub> O <sub>2</sub> | 1065.80 | 437.80  | 1.20 |
| 42       | 2-Pentanone          | 107-87-9 | C <sub>5</sub> H <sub>10</sub> O             | 1002.00 | 362.29  | 1.38 |
| 43       | Acetone              | 67-64-1  | C <sub>3</sub> H <sub>6</sub> O              | 842.00  | 251.55  | 1.11 |
| 44       | 2-Butanone           | 78-93-3  | C <sub>4</sub> H <sub>8</sub> O              | 918.40  | 298.80  | 1.28 |
| 45       | Cyclopentanone       | 120-92-3 | C <sub>5</sub> H <sub>8</sub> O              | 1147.50 | 567.85  | 1.33 |
| Alkenes  |                      |          |                                              |         |         |      |
| 46       | Limonene             | 138-86-3 | C <sub>10</sub> H <sub>16</sub>              | 1200.30 | 699.56  | 1.22 |
| 47       | Terpinolene          | 586-62-9 | C <sub>10</sub> H <sub>16</sub>              | 1299.20 | 822.05  | 1.20 |
| Furans   |                      |          |                                              |         |         |      |
| 48       | Furfural             | 98-01-1  | C <sub>5</sub> H <sub>4</sub> O <sub>2</sub> | 1493.80 | 1253.96 | 1.09 |
| Pyridine |                      |          |                                              |         |         |      |
| 49       | 2,6-Dimethylpyridine | 108-48-5 | C <sub>7</sub> H <sub>9</sub> N              | 1246.50 | 736.83  | 1.45 |
| Acids    |                      |          |                                              |         |         |      |
| 50       | Acetic acid          | 64-19-7  | C <sub>2</sub> H <sub>4</sub> O <sub>2</sub> | 1503.70 | 1281.26 | 1.14 |

Note: reserved index (RI), retention time (Rt), drift time (Dt), monomer (M), dimer (D)
